# Supplementary material for: Heterometallic Ln–Cu complexes derived from a phenyl pyrimidyl substituted nitronyl nitroxide biradical
Source: Royal Society of Chemistry journal article supplement (doi:10.1039/c9dt03081f), 2019-01-01
Supplement: c9dt03081f1.pdf [file c9dt03081f1.pdf]

## Supporting Information

### **Heterometallic Ln-Cu complexes derived from phenyl pyrimidyl substituted nitronyl nitroxide biradical**

Kang Wang, Juan Sun, Lu Xi, Jiao Lu, Pei Jing, Licun Li\*

*Department of Chemistry, Key Laboratory of Advanced Energy Materials Chemistry,  
Nankai University, Tianjin 300071, China*

*\* Corresponding author. E-mail address: llicun@nankai.edu.cn*

Table S1 Important bond lengths [Å] and angles [°] for **1-3**.

| <b>1 Gd</b>       |           |                   |           |
|-------------------|-----------|-------------------|-----------|
| Gd(1)-O(2)        | 2.425(4)  | Gd(1)-O(3)        | 2.386(4)  |
| Gd(1)-O(9)        | 2.400(4)  | Gd(1)-O(10)       | 2.403(4)  |
| Gd(1)-O(11)       | 2.379(5)  | Gd(1)-O(12)       | 2.347(5)  |
| Gd(1)-O(13)       | 2.364(5)  | Gd(1)-O(14)       | 2.404(4)  |
| O(1)-N(3)         | 1.261(7)  | O(2)-N(4)         | 1.304(6)  |
| O(3)-N(5)         | 1.306(7)  | O(4)-N(6)         | 1.253(8)  |
| Cu(1)-N(1)        | 2.414(5)  | Cu(2)-N(2)        | 2.411(5)  |
| Cu(1)-O(5)        | 1.951(4)  | Cu(1)-O(6)        | 1.990(4)  |
| Cu(2)-O(7)        | 1.962(5)  | Cu(2)-O(8)        | 1.954(4)  |
| N(4)-O(2)-Gd(1)   | 137.5(3)  | N(5)-O(3)-Gd(1)   | 138.8(3)  |
| O(3)-Gd(1)-O(2)   | 79.45(15) | O(9)-Gd(1)-O(10)  | 72.04(15) |
| O(12)-Gd(1)-O(11) | 71.19(16) | O(13)-Gd(1)-O(14) | 71.06(15) |
| O(5)-Cu(1)-O(6)   | 91.91(17) | O(8)-Cu(2)-O(7)   | 92.10(18) |
| <b>2 Tb</b>       |           |                   |           |
| Tb(1)-O(2)        | 2.390(5)  | Tb(1)-O(3)        | 2.396(6)  |
| Tb(1)-O(9)        | 2.378(5)  | Tb(1)-O(10)       | 2.390(5)  |
| Tb(1)-O(11)       | 2.318(6)  | Tb(1)-O(12)       | 2.351(6)  |
| Tb(1)-O(13)       | 2.360(6)  | Tb(1)-O(14)       | 2.353(5)  |
| N(3)-O(1)         | 1.248(9)  | O(2)-N(4)         | 1.307(8)  |
| O(3)-N(5)         | 1.301(8)  | N(6)-O(4)         | 1.262(9)  |
| Cu(1)-N(1)        | 2.365(6)  | Cu(2)-N(2)        | 2.394(5)  |
| Cu(1)-O(5)        | 1.961(5)  | Cu(1)-O(6)        | 1.970(5)  |
| Cu(2)-O(7)        | 1.938(5)  | Cu(2)-O(8)        | 1.968(5)  |
| N(4)-O(2)-Tb(1)   | 137.9(5)  | N(5)-O(3)-Tb(1)   | 139.1(4)  |
| O(2)-Tb(1)-O(3)   | 79.8(2)   | O(9)-Tb(1)-O(10)  | 72.15(17) |
| O(11)-Tb(1)-O(12) | 73.0(2)   | O(14)-Tb(1)-O(13) | 71.72(18) |
| O(5)-Cu(1)-O(6)   | 92.3(2)   | O(7)-Cu(2)-O(8)   | 92.4(2)   |
| <b>3 Dy</b>       |           |                   |           |
| Dy(1)-O(2)        | 2.404(9)  | Dy(1)-O(3)        | 2.381(10) |
| Dy(1)-O(9)        | 2.367(8)  | Dy(1)-O(10)       | 2.355(9)  |
| Dy(1)-O(11)       | 2.289(12) | Dy(1)-O(12)       | 2.350(11) |
| Dy(1)-O(13)       | 2.354(9)  | Dy(1)-O(14)       | 2.326(8)  |
| O(1)-N(3)         | 1.231(15) | O(2)-N(4)         | 1.257(14) |
| O(3)-N(5)         | 1.285(14) | O(4)-N(6)         | 1.275(15) |
| Cu(1)-N(1)        | 2.350(9)  | Cu(2)-N(2)        | 2.412(8)  |
| Cu(1)-O(5)        | 1.954(9)  | Cu(1)-O(6)        | 1.956(7)  |
| Cu(2)-O(7)        | 1.939(8)  | Cu(2)-O(8)        | 1.980(9)  |
| N(4)-O(2)-Dy(1)   | 139.7(11) | N(5)-O(3)-Dy(1)   | 138.3(7)  |
| O(3)-Dy(1)-O(2)   | 78.2(4)   | O(10)-Dy(1)-O(9)  | 71.9(3)   |
| O(11)-Dy(1)-O(12) | 74.0(4)   | O(14)-Dy(1)-O(13) | 72.1(3)   |
| O(5)-Cu(1)-O(6)   | 92.5(3)   | O(7)-Cu(2)-O(8)   | 92.4(4)   |

Table S2 SHAPE analysis for the 8-coordinated Ln<sup>III</sup> ions of **1-3**.

| Compound    | SAPR-8 | TDD-8        | JBTPR-8 | BTPR-8       | JSD-8 |
|-------------|--------|--------------|---------|--------------|-------|
| <b>1</b> Gd | 1.441  | <b>0.998</b> | 1.864   | <b>1.075</b> | 3.744 |
| <b>2</b> Tb | 1.328  | <b>1.180</b> | 1.937   | <b>1.115</b> | 3.924 |
| <b>3</b> Dy | 1.374  | <b>1.203</b> | 1.878   | <b>1.145</b> | 3.979 |

SAPR-8: Square antiprism; TDD-8: Triangular dodecahedron; JBTPR-8: Biaugmented trigonal prism J50; BTPR-8: Biaugmented trigonal prism; JSD-8: Snub diphenoid J84.

Table S3 Magnetic parameters and coordination geometry of Ln ion for complex **3** and the related nitronyl nitroxide biradical-Dy discrete complexes.

| Compounds                                                                        | $\Delta_{\text{eff}}/k_B$ (K) | $\tau_0$ (s)          | $H_{\text{dc}}$ (Oe) | Closest ideal geometry | Ref.      |
|----------------------------------------------------------------------------------|-------------------------------|-----------------------|----------------------|------------------------|-----------|
| [Dy(hfac) <sub>3</sub> (NITmbis)] <sub>2</sub>                                   | 11.6                          | $2.3 \times 10^{-8}$  | 0                    | $C_{2v}$               | 11a       |
| [Dy(hfac) <sub>3</sub> (NITPymbis)] <sub>2</sub> ·C <sub>7</sub> H <sub>16</sub> | none                          | none                  | 0                    | $C_{2v}$               | 11b       |
| [Dy(hfac) <sub>3</sub> (NITFumbis)] <sub>2</sub>                                 | 15                            | $1.25 \times 10^{-6}$ | 3000                 | $C_{2v}$               | 11c       |
| [Dy <sub>2</sub> Co <sub>2</sub> (hfac) <sub>10</sub> (NITPhPybis)] <sub>2</sub> | 6.03                          | $5.2 \times 10^{-5}$  | 1000                 | $C_{2v}$               | 13b       |
| [Dy(hfac) <sub>3</sub> Cu(hfac) <sub>2</sub> (bisNITPhPyrim)]                    | 8.13                          | $1.07 \times 10^{-6}$ | 500                  | $C_{2v} \sim D_{2d}$   | this work |

NITmbis=1,3-bis-(1'-oxyl-3'-oxido-4',4',5',5'-tetramethyl-4,5-hydro-1*H*-imidazol-2-yl)benzene; NITPymbis = 1,3-bis-(1'-oxyl-3'-oxido-4',4',5',5'-tetramethyl-4,5-hydro-1*H*-imidazol-2-yl)pyridine; NITFumbis=2,5-bis-(1'-oxyl-3'-oxido-4',4',5',5'-tetramethyl-4,5-hydro-1*H*-imidazol-2-yl)furan; NITPhPybis=5-(4-pyridyl)-1,3-bis(1'-oxyl-3'-oxido-4',4',5',5'-tetramethyl-4,5-hydro-1*H*-imidazol-2-yl)benzene.

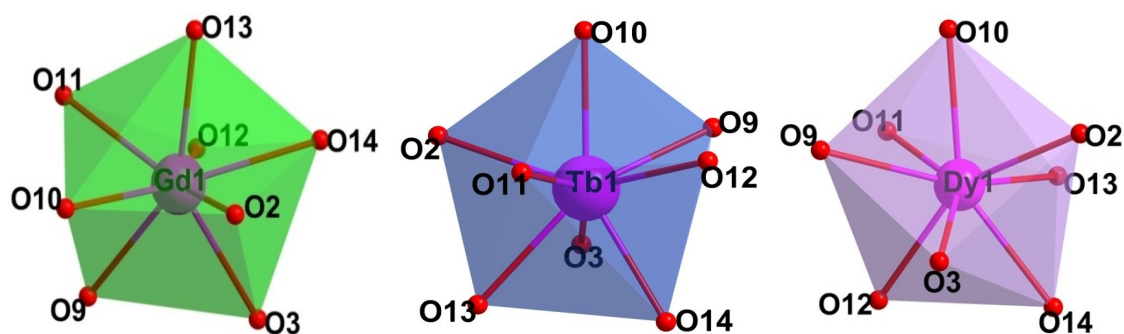Fig.S1 Coordination polyhedrons of Ln<sup>III</sup> ions for complexes **1-3**.

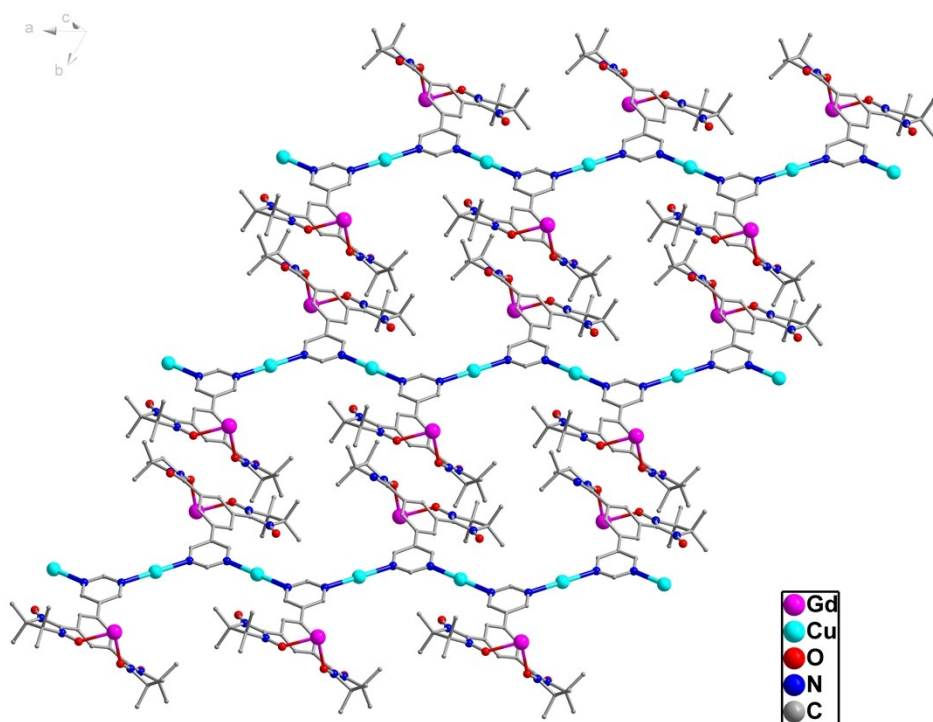

Fig.S2 Packing diagram of complex 1. H atoms and hfac coligands are not shown for clarity.

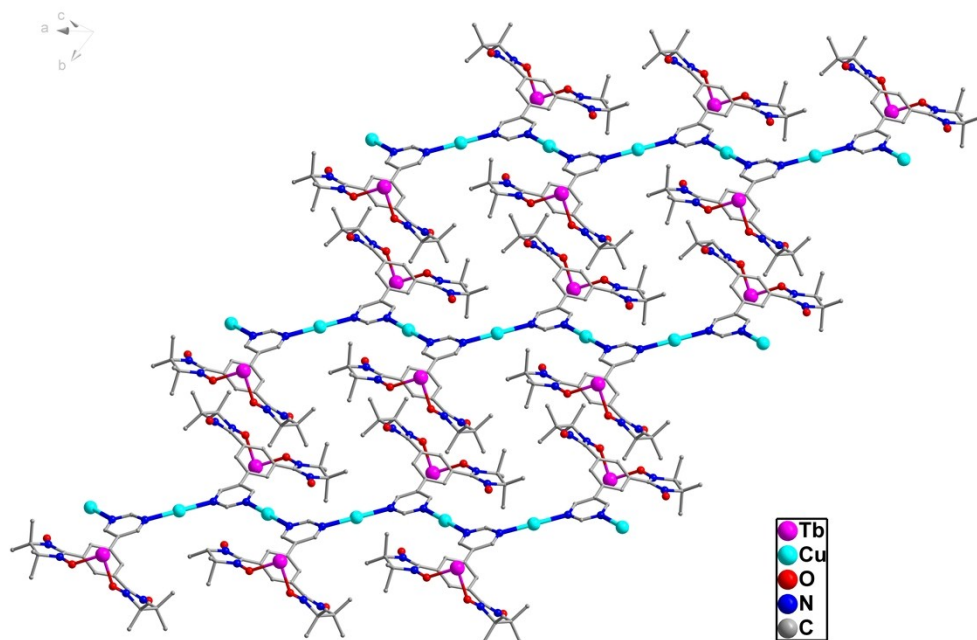

Fig.S3 Packing diagram of complex 2. H atoms and hfac coligands are not shown for clarity.

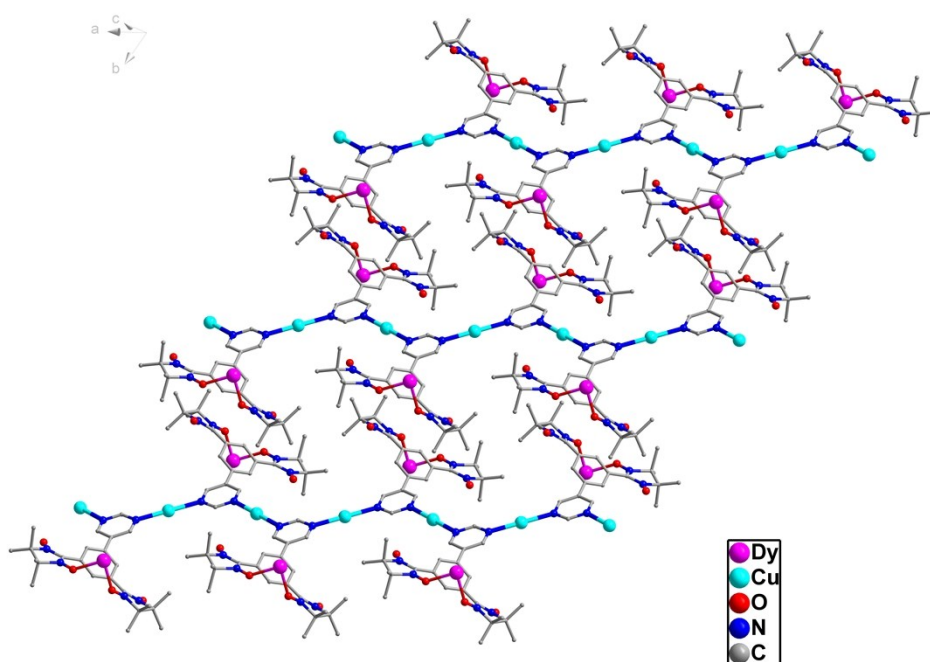

Fig.S4 Packing diagram of complex **3**. H atoms and hfac coligands are not shown for clarity.

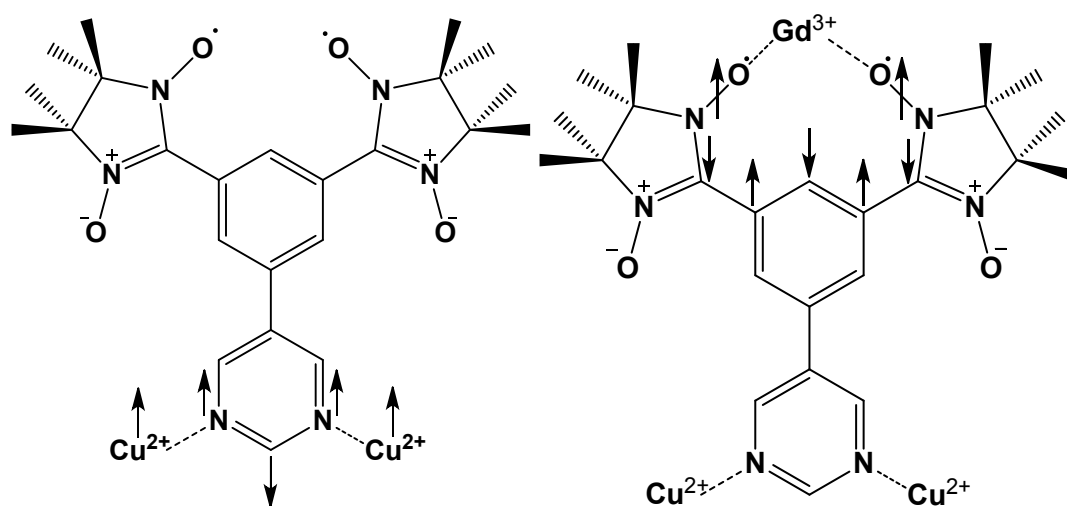

Scheme S1 (left) Spin polarization mechanism for the magnetic coupling mediated by pyrimidyl ring; (right) Spin polarization mechanism for the magnetic coupling mediated by *m*-phenylene ring between two radicals.

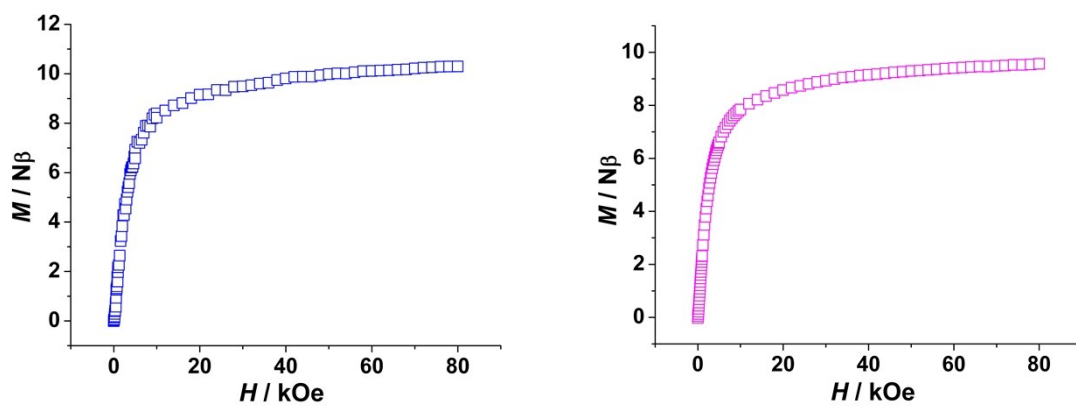

Fig.S5  $M$  vs.  $H$  plots of **2** (blue) and **3** (pink) at 2.0 K.

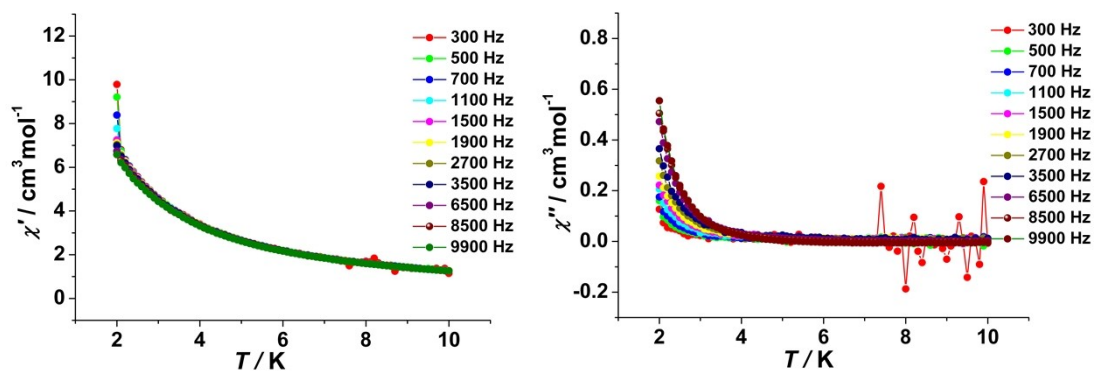

Fig.S6 Temperature dependence of  $\chi'$  (left) and  $\chi''$ (right) ac susceptibility under zero dc field for **2**.

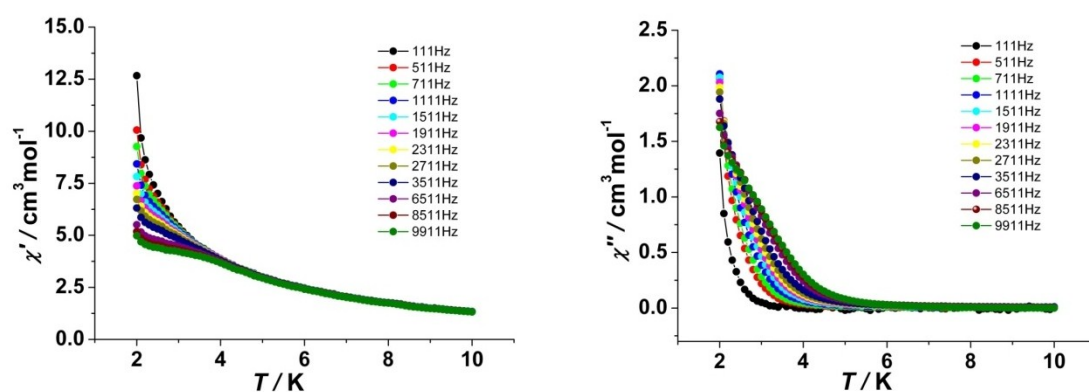

Fig.S7 Temperature dependence of  $\chi'$  (left) and  $\chi''$ (right) ac susceptibility under zero dc field for **3**.

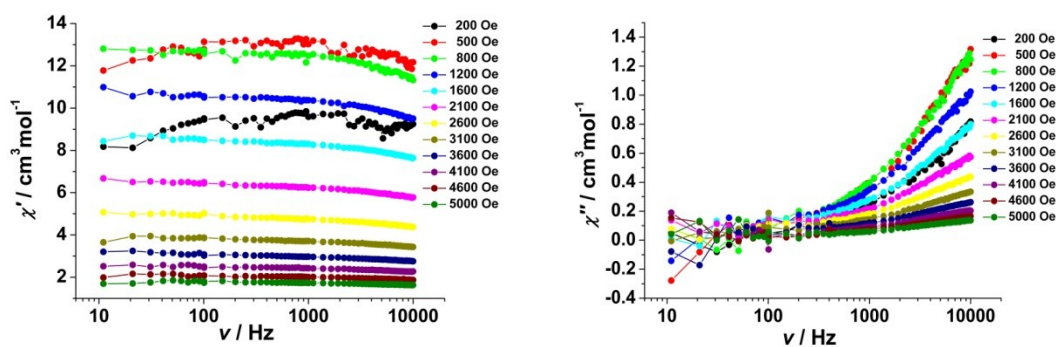

Fig.S8 Frequency dependence of  $\chi'$  (left) and  $\chi''$ (right) ac susceptibility at 2 K under different dc fields for 2.

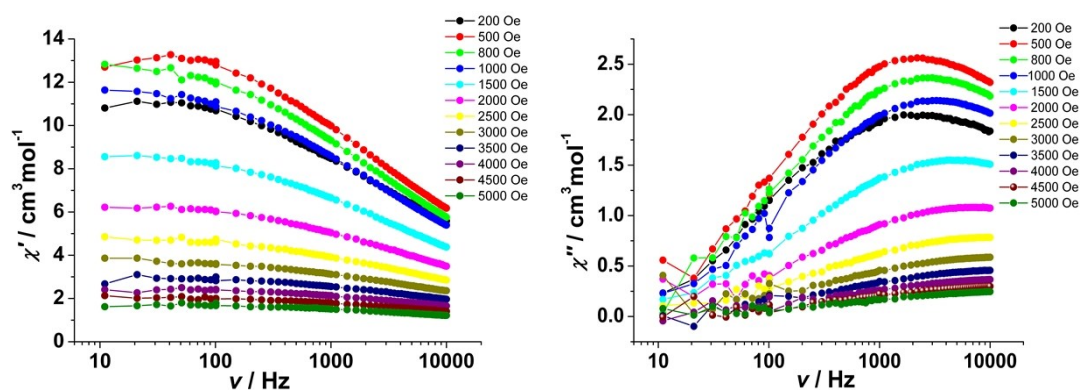

Fig.S9 Frequency dependence of  $\chi'$  (left) and  $\chi''$ (right) ac susceptibility at 2 K under different dc fields for 3.

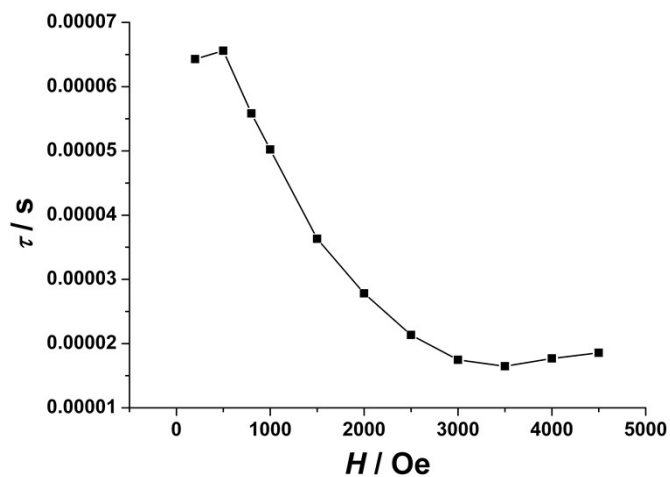

Fig.S10 The  $\tau$  versus  $H$  plot for complex 3 at 2 K under applied dc fields.

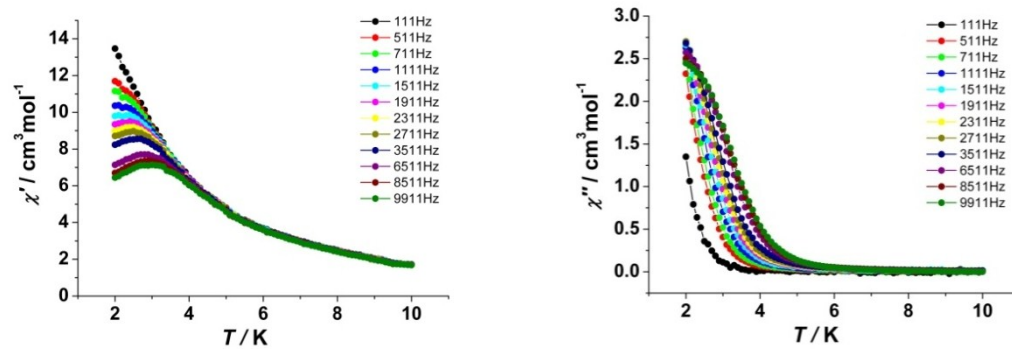

Fig.S11 Temperature dependence of  $\chi'$  (left) and  $\chi''$ (right) ac susceptibility under 500 Oe dc field for **3**.
